# Supplementary material for: Engineering a conductive network of atomically thin bismuthene with rich defects enables CO2 reduction to formate with industry-compatible current densities and stability
Source: Royal Society of Chemistry journal article supplement (doi:10.1039/d1ee01495a), 2021-01-01
Supplement: d1ee01495a1.pdf [file d1ee01495a1.pdf]

## Supplementary Information for

### **Engineering conductive network of atomically thin bismuthene with rich defects enables CO<sub>2</sub> reduction to formate with industry- compatible current densities and stability**

Min Zhang,<sup>a,c</sup> Wenbo Wei,<sup>a,c</sup> Shenghua Zhou,<sup>a,c</sup> Dong-Dong Ma,<sup>a</sup> Aihui Cao,<sup>a,c</sup> Xin-Tao Wu,<sup>a,b,c</sup> Qi-Long Zhu<sup>\*a,b,c</sup>

<sup>a</sup> State Key Laboratory of Structural Chemistry, Fujian Institute of Research on the Structure of Matter, Chinese Academy of Sciences (CAS), Fuzhou 350002, China

<sup>b</sup> Fujian Science & Technology Innovation Laboratory for Optoelectronic Information of China, Fuzhou 350108, China

<sup>c</sup> University of Chinese Academy of Sciences, Beijing 100049, China

\*E-mail: qlzhu@fjirsm.ac.cn

## 1. Experimental details

### 1.1 Chemicals

GO dispersion solution ( $5.88 \text{ mg mL}^{-1}$ ) was purchased from Shandong Yuhuang New Energy Technology Co., Ltd. Bismuth nitrate pentahydrate ( $\text{Bi}(\text{NO}_3)_3 \cdot 5\text{H}_2\text{O}$ ), nitric acid (65–68%,  $\text{HNO}_3$ ), hexadecyltrimethylammonium bromide (CTAB), potassium bicarbonate ( $\text{KHCO}_3$ ), potassium hydroxide (KOH), Phenolphthalein, N,N-dimethylformamide (DMF), and ethanol were obtained from Sinopharm Chemical Reagent Co. Ltd. (Shanghai, China). Bismuth power was purchased from Energy Chemical Reagent Co. Ltd. (Shanghai, China). Nafion solution (5 wt%) was obtained from Sigma-Aldrich. All chemical reagents were used directly without further purification.

### 1.2 Instrumentation

Powder X-ray diffraction (PXRD) patterns were measured by the Miniflex600 X-ray diffractometer at 40 kV and 40 mA with  $\text{Cu K}\alpha$  radiation. The morphologies of the samples were observed by field-emission scanning electron microscopy (FESEM, JSM6700, operated at an accelerating voltage of 5 kV) and transmission electron microscopy (TEM, F20, operated at an accelerating voltage of 200 kV). AFM images were obtained in a Bruker Dimension ICON atomic force microscope. The Fourier transform infrared (FTIR) spectra were recorded on a Spectrum One Fourier transform infrared spectrometer (Perking-Elmer Instruments) by using the KBr as a background. X-ray photoelectron spectroscopy (XPS) with monochromatized Al  $\text{K}\alpha$  X-rays ( $h\nu = 1486.6 \text{ eV}$ ) radiation (ThermoFisher Scientific Co. ESCALAB 250Xi, USA) was used to investigate the surface electronic properties. The binding energy calibration of the spectra was referred to the C1s peak located at  $\text{BE} = 284.8 \text{ eV}$  for the analysis. Operando attenuated total reflection-infrared (ATR-IR) spectra were recorded on the NICOLET 6700 instrument.

### 1.3 Preparation

*Preparation of GO paper:* The aqueous GO dispersion (25 mL) at a concentration of  $2 \text{ mg mL}^{-1}$  was vacuum filtered to prepare the GO paper, which was dried at room temperature for the subsequent use.

*Preparation of  $\text{Bi}_2\text{O}_3$  networks:*  $\text{Bi}(\text{NO}_3)_3 \cdot 5\text{H}_2\text{O}$  (0.987g) was added to DMF (20 mL) during vigorous stirring at room temperature, and then the **GO paper** was immersed in the solution of  $\text{Bi}(\text{NO}_3)_3 \cdot 5\text{H}_2\text{O}$  ( $0.1 \text{ mol L}^{-1}$ ) for 24 h. After immersion, the GO paper was taken out and washed by DMF twice and dried at  $150 \text{ }^\circ\text{C}$  for 12 h in vacuum oven. Finally, the hybrid GO paper was treated sequentially at  $350 \text{ }^\circ\text{C}$  for 2 h and at  $500 \text{ }^\circ\text{C}$  for 1 h in air to burn out GO with a heating rate of  $5 \text{ }^\circ\text{C min}^{-1}$ .

*Preparation of Bi-ene-NW:* Bi-ene-NW was synthesized via an in situ electrochemical transformation approach from the obtained Bi<sub>2</sub>O<sub>3</sub> network in a two-electrode system. The Bi<sub>2</sub>O<sub>3</sub> network was dispersed in the mixture of water, ethanol and Nafion solution (8:1:1), and casted onto a 0.5×1.0 cm<sup>2</sup> carbon fiber paper with a catalyst areal loading of 1 mg cm<sup>-2</sup> as the working electrode. The transformation experiment was carried out in H-type cell with two compartments separated by a piece of proton exchange membrane (Nafion 117). The working electrode and the reference electrode (saturated Ag/AgCl) were placed in the cathode compartment, and the counter electrode (Pt mesh) was placed in the anodic compartment. Each compartment contained 0.5 M KHCO<sub>3</sub> electrolyte (10 mL). All potentials were converted to the RHE scale (ERHE = ESCE + 0.198 V + 0.0591 V × pH). Cyclic voltammetry (CV) was performed at a scan rate of 100 mV s<sup>-1</sup> between 0.376 and 1.176 V (vs. RHE) for 100 cycles in CO<sub>2</sub>-saturated 0.5 M KHCO<sub>3</sub> electrolyte for the cathodic transformation of the Bi<sub>2</sub>O<sub>3</sub> network, generating to Bi-ene-NW (Fig. S6a).

*Preparation of Bi-NF:* Bi(NO<sub>3</sub>)<sub>3</sub>·5H<sub>2</sub>O (0.243 g) was dissolved into the concentrated HNO<sub>3</sub> (0.125 mL), leading to a transparent solution, which was then added dropwise into deionized water (5 mL) with constant stirring, leading to a solution (Solution A). Concurrently, CTAB (0.125 g) was dissolved into deionized water (60 mL) through ultrasonication to form another transparent solution (Solution B). Then, the solution A was dropwise added into solution B with constant stirring. The mixture was kept at 30 °C for 3 h. The precipitate was collected by centrifugation, completely washed with ethanol and deionized water several times, and dried, which was finally cathodically reduced to the Bi nanoflowers (Bi-NFs), following the similar procedures to Bi-ene-NW.

*Preparation of Bi-MP:* The commercial bismuth power was firstly converted into Bi<sub>2</sub>O<sub>3</sub> in air at 600 °C for 6 h with a heating rate of 5 °C min<sup>-1</sup>. Then, the converted Bi<sub>2</sub>O<sub>3</sub> was cathodically reduced to the Bi microparticles (Bi-MPs), following the similar procedures to Bi-ene-NW.

Carbon paper supported Bi electrodes were prepared by in situ electrochemical reduction of Bi<sub>2</sub>O<sub>3</sub>. The obtained electrode was rinsed with water and ethanol immediately, and then tested by PXRD, XPS and SEM. In order to further obtain the detail morphology and nanostructure, these Bi electrodes were placed in ethanol for ultrasonic treatment, and then the ethanol solution containing sample was used immediately for HRTEM and AFM tests. For ATR-IR measurements, firstly, the Bi<sub>2</sub>O<sub>3</sub>-NS-NW supported on the glassy carbon electrode was electrochemically reduced into Bi-ene-NW. Then, the loaded Bi-ene-NW electrode was used as the working electrode, along with Ag/AgCl as the reference electrode, and platinum wire as the counter electrode.

## 1.4 Electrochemical measurements

For CO<sub>2</sub>RR measurements, the carbon fiber paper supported Bi-ene-NW was directly used as the working electrode in the typical H-type cell with two compartments. The electrolyte was pre-saturated with Ar (pH = 8.4) or CO<sub>2</sub> (pH = 7.4). A constant CO<sub>2</sub> flow of

20 sccm was continuously bubbled into the electrolyte to maintain its saturation during CO<sub>2</sub>RR measurements. Cyclic voltammetry and polarization curves were carried out at a scan rate of 10 mV s<sup>-1</sup>.

In order to analyze the reduction products and calculate their Faradaic efficiency, the electrolysis was performed at selected potentials for 1 h. During the electrolysis, gaseous products were detected by an on-line gas chromatography (GC) (Agilent 7820A) equipped with a molecular sieve 5 Å and two porapak Q columns continuously. The concentration of H<sub>2</sub> and CO was analyzed by a thermal conductivity detector (TCD) and a flame ionization detector (FID), respectively. The quantification of gaseous products was carried out using a conversion factor derived from the standard calibration gases. The Faradaic efficiency of gaseous products was calculated as below:

$$FE = \frac{N \times C \times v \times F}{V_m \times j_{total}} \times 100\% \quad (1)$$

where  $N$  is the number of electrons required to form a molecule of product,  $C$  is the measured concentration of product,  $v$  is the flow rate of CO<sub>2</sub>,  $F$  is the Faraday constant (96 480 C mol<sup>-1</sup>),  $V_m$  is the molar volume of gas when temperature is 298 K, and  $j_{total}$  is the recorded current.

Liquid products were collected at the end of each electrocatalysis and analyzed by <sup>1</sup>H NMR (AVANCE III HD). For the NMR, 0.5 ml of the catholyte was mixed with 0.1 ml of D<sub>2</sub>O containing dimethylsulfoxide (DMSO, 10 ppm) as the internal standard. The concentration of formate was quantitatively determined from its NMR peak area relative to that of the internal standard using the calibration curve from a series of standard formate solutions. The Faradaic efficiency of formate was calculated as follows:

$$FE = \frac{n_{formate} \times N \times F}{Q_{total}} \times 100\% \quad (2)$$

where  $n_{formate}$  is the measured amount of formate in the cathode compartment and  $Q_{total}$  is total electric quantity.

The half-cell cathodic energy efficiency (CEE) was calculated as follows:

$$CEE = \frac{1.23 - E_{formate}}{1.23 - E_{applied}} \times FE_{formate} \times 100\% \quad (3)$$

where  $E_{formate} = -0.2$  V vs. RHE is the thermodynamic potential of CO<sub>2</sub> reduction to formate.  $FE_{formate}$  is the Faradaic efficiency of formate production.  $E_{applied}$  is the applied potential vs. RHE.

*Long-term stability test:* The stability tests were conducted using the bigger H-cell by adjusting the anolyte and catholyte to 125 mL. In order to avoid the influence of catalyst falling off, the loading amount was change to 2.0 mg cm<sup>-2</sup>. In the process of electrolysis, CO<sub>2</sub> is continuously converted into formate, and the K<sup>+</sup> ions continuously migrate from anolyte to catholyte through Nafion 117 to maintain the charge balance of electrolyte, which will affect the water oxidation reaction at the anode side and eventually inhibit CO<sub>2</sub> reduction. Therefore, it is necessary to renew the electrolyte after a period of electrolysis.

*Flow cell measurements:* Flow cell measurements were performed in a custom-designed flow cell reactor. It consisted of Bi<sub>2</sub>O<sub>3</sub>-loaded GDE (2 mg cm<sup>-2</sup>, 1×1 cm<sup>2</sup>) as the cathode, a piece of anion exchange membrane (Fumapem FAA-3-PK-130) as the separator, and a porous nickel foam as the anode. Ag/AgCl reference electrode with a diameter of 6 mm was located inside the cathode compartment. Electrode potentials were converted to the reversible hydrogen electrode (RHE) scale with 85% iR compensation. During the measurements, CO<sub>2</sub> gas was directly fed to the cathodic GDE at a rate of 20 sccm. The catholyte was 1 M KHCO<sub>3</sub> or 1 M KOH. It was forced to continuously circulate through the cathode compartment at a rate of 20 ml min<sup>-1</sup>.

## 1.5 Computational methods

DFT calculations were performed using the Vienna ab initio simulation package (VASP) [S15,S16]. The interactions between ions and electrons was described by projector augmented wave (PAW) and generalized gradient approximation (GGA) with Perdew-Burke-Ernzerhof (PBE) functional [S17,S18]. The kinetic cut-off energy for the plane-wave basis set was 400 eV. The Brillouin zone integration was sampled with 3 × 3 × 1 Monkhorst-Pack grid. All the atoms were fully relaxed until the Hellmann-Feynman force on each atom was less than -0.02 eV Å<sup>-1</sup> and 10<sup>-5</sup> eV. Here, we investigated the (003), (012), (104) and (110) planes of Bi with the supercell of 3 × 4 × 1 unit cells, where 6 atomic layers with the bottom 2 atomic layers were fixed along the z direction and another 15 Å vacuum space was included to avoid the periodic interaction along the y and z direction, respectively.

## 2. Supplementary figures

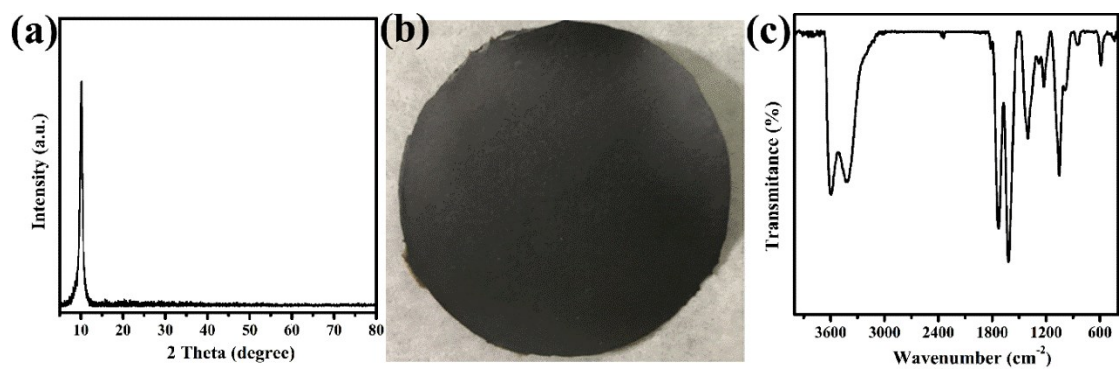

**Fig. S1** (a) PXRD pattern, (b) photographic picture, and (c) IR spectrum of the GO paper.

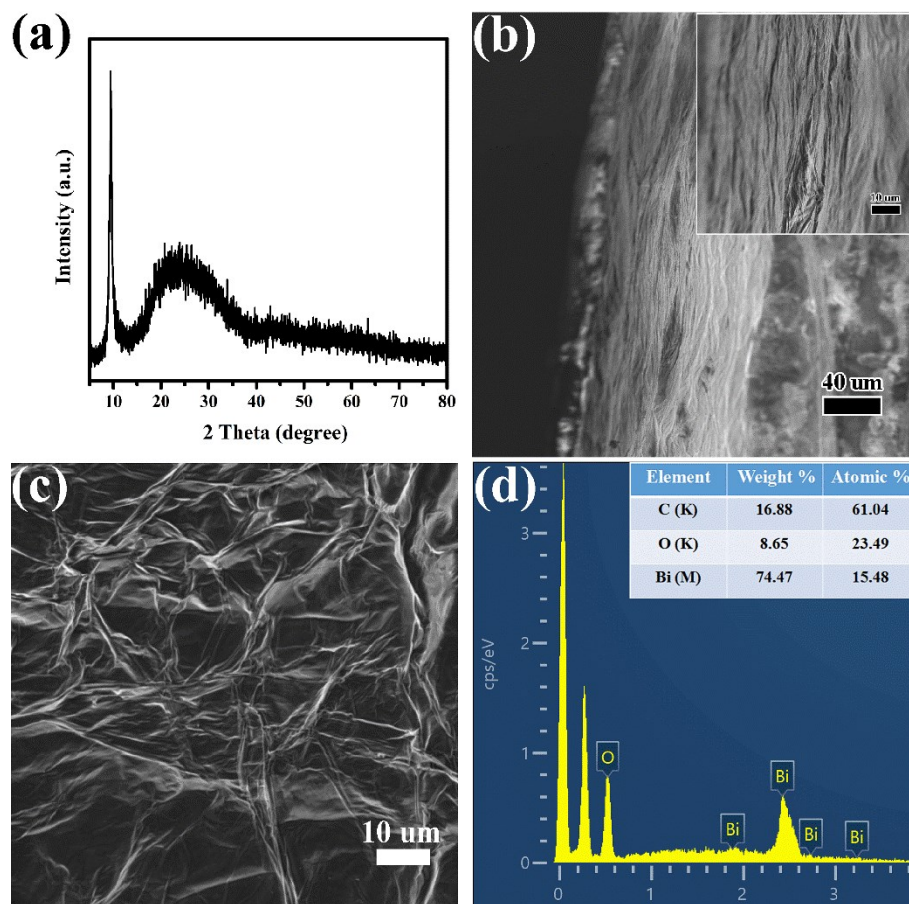

**Fig. S2** (a) PXRD pattern, (b,c) plan view and cross-sectional view of the SEM images, and (d) EDX spectrum of the GO paper adsorbed with  $\text{Bi}(\text{NO}_3)_3$ .

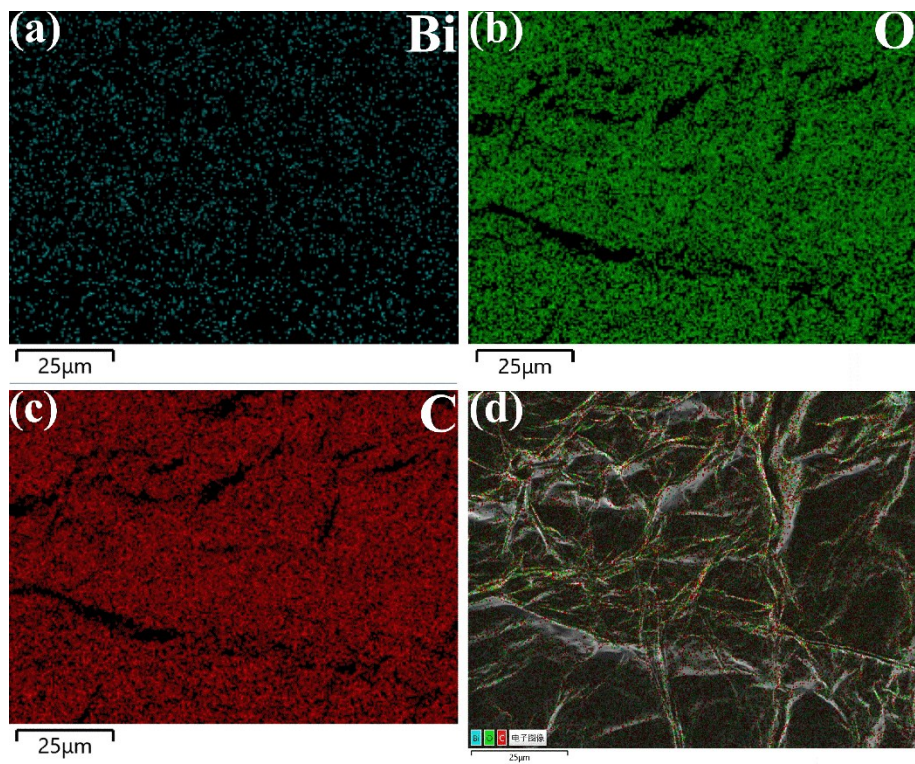

**Fig. S3** EDX element mapping images of the GO paper adsorbed with  $\text{Bi}(\text{NO}_3)_3$ .



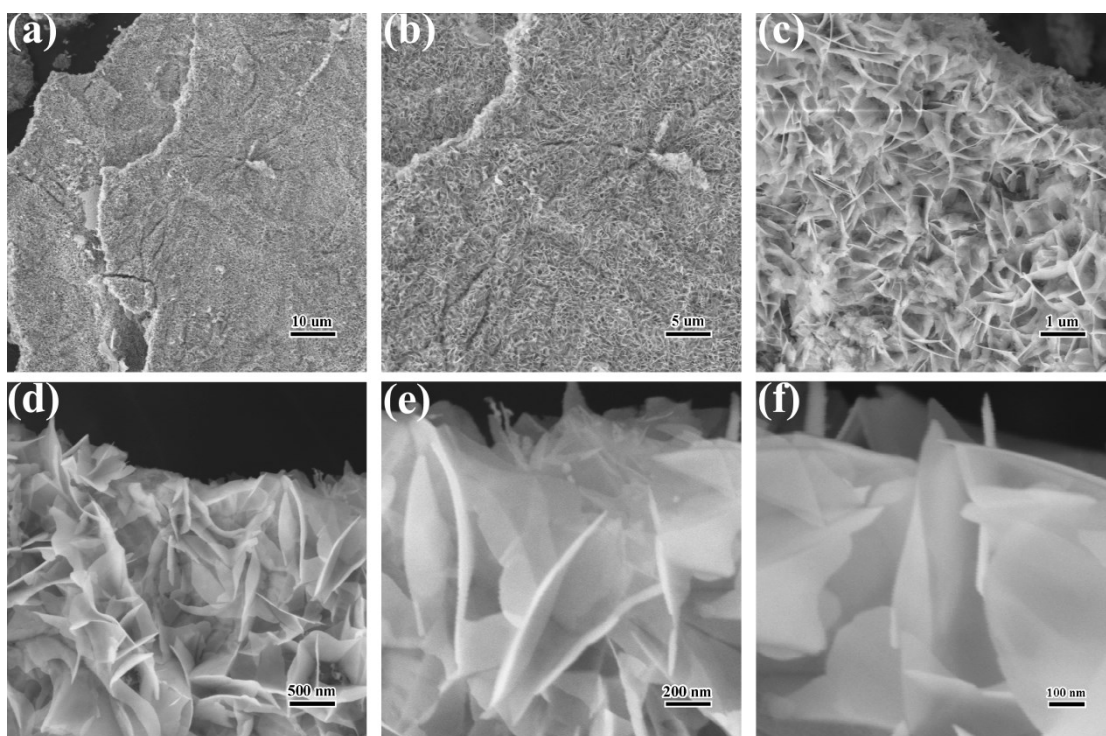

**Fig. S4** SEM images of  $\text{Bi}_2\text{O}_3$ -NS-NW composed of the interconnected  $\text{Bi}_2\text{O}_3$  NSs.

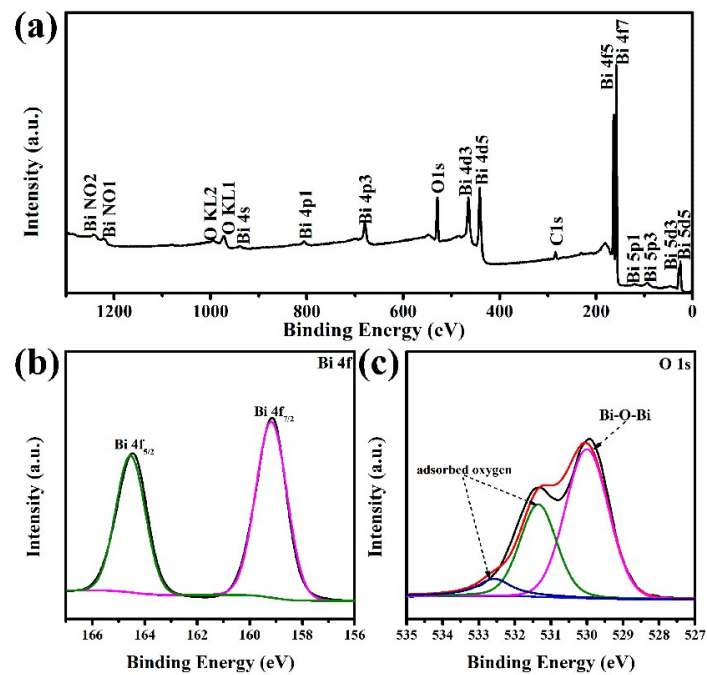

**Fig. S5** XPS spectra of Bi<sub>2</sub>O<sub>3</sub>-NS-NW: (a) survey spectrum, high-resolution (b) Bi 4f and (c) O 1s spectra.

XPS survey spectrum of Bi<sub>2</sub>O<sub>3</sub>-NS-NW shows different orbital peaks of Bi, O and C elements. The binding energies obtained in the XPS analysis were corrected using the C 1s peak (284.8 eV) as reference originated from carbon binder. The high-resolution XPS spectrum of Bi<sub>2</sub>O<sub>3</sub>-NS-NW presents spin-orbit split doublets of Bi 4f with the peaks at 164.2 and 158.9 eV, corresponding to Bi 4f<sub>5/2</sub> and Bi 4f<sub>7/2</sub>. Additionally, the O 1s spectrum exhibits a peak at 530.3 eV that corresponds to the oxygen in metal oxide, further confirming the formation of Bi<sub>2</sub>O<sub>3</sub>.

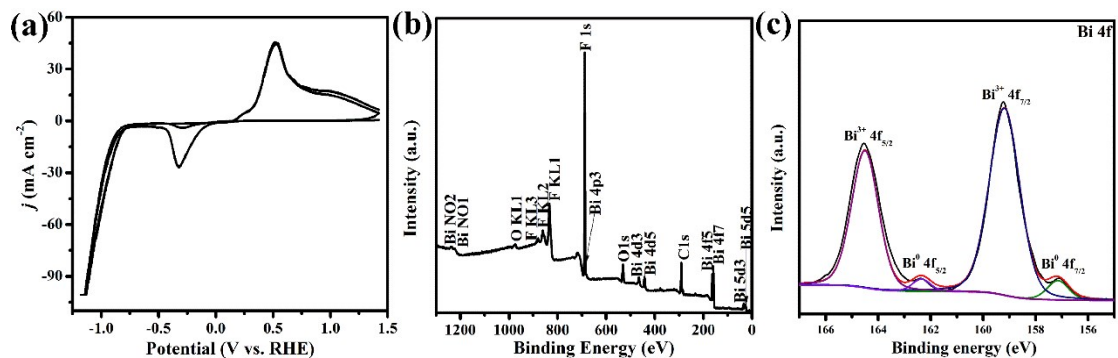

**Fig. S6** (a) CV curve of  $\text{Bi}_2\text{O}_3$ -NS-NW in  $\text{CO}_2$ -saturated 0.5 M  $\text{KHCO}_3$ ; (b, c) XPS survey spectrum and Bi 4f spectrum of Bi-ene-NW.

Fig. S6a depicts the cyclic voltammetry (CV) curve of  $\text{Bi}_2\text{O}_3$ -NS-NW in  $\text{CO}_2$ -saturated 0.5 M  $\text{KHCO}_3$ , which exhibits a pronounced cathodic wave peaked at  $-0.35$  V and sequential anodic waves between 0.2 and 1.2 V. They correspond to the redox interconversion between  $\text{Bi}^{3+}$  and metallic Bi. XPS survey spectrum of Bi-ene-NW in Fig. S6b presents orbital peaks of the Bi, C, F and O elements, and the F element originates from the Nafion polymer. The high-resolution Bi 4f XPS spectrum were fitted and analyzed, as shown in Fig. S6c, which can be deconvoluted into four peaks, corresponding to  $\text{Bi} 4f_{5/2}$  ( $\text{Bi}^{3+}$  and  $\text{Bi}^0$ ) and  $\text{Bi} 4f_{7/2}$  ( $\text{Bi}^{3+}$  and  $\text{Bi}^0$ ). The appearance of trivalent bismuth in Bi-ene-NW should be attributed to partial oxidation of its highly exposed surface.

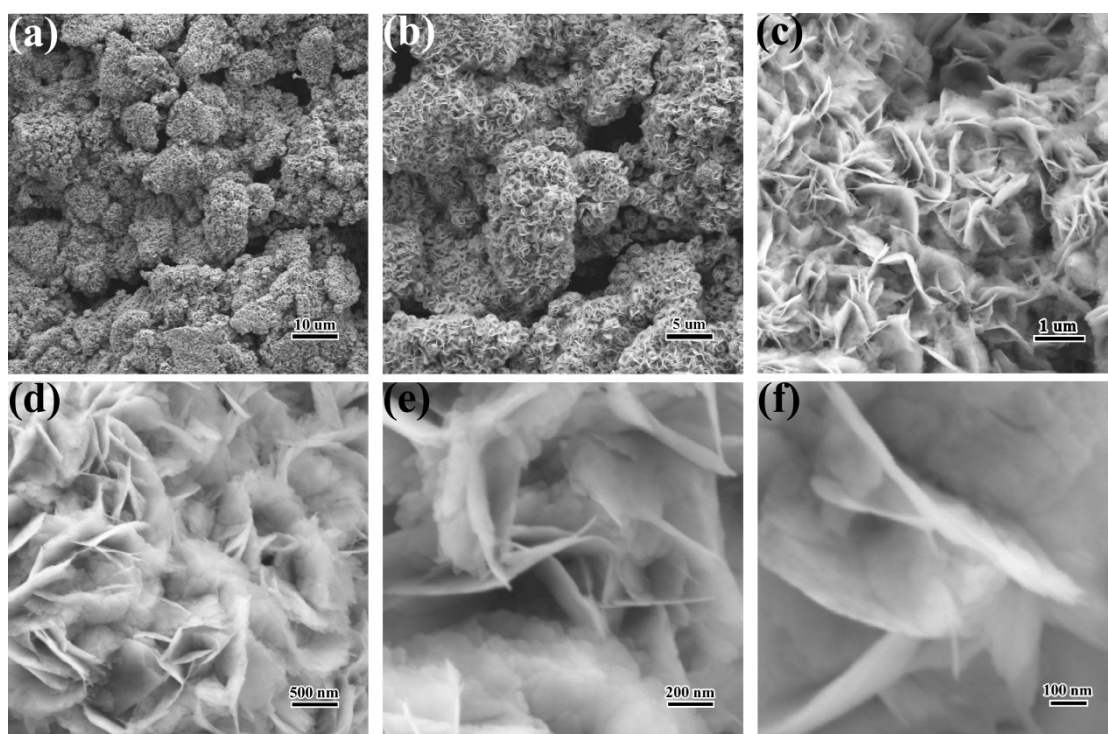

**Fig. S7** SEM images of Bi-ene-NW at different magnifications.

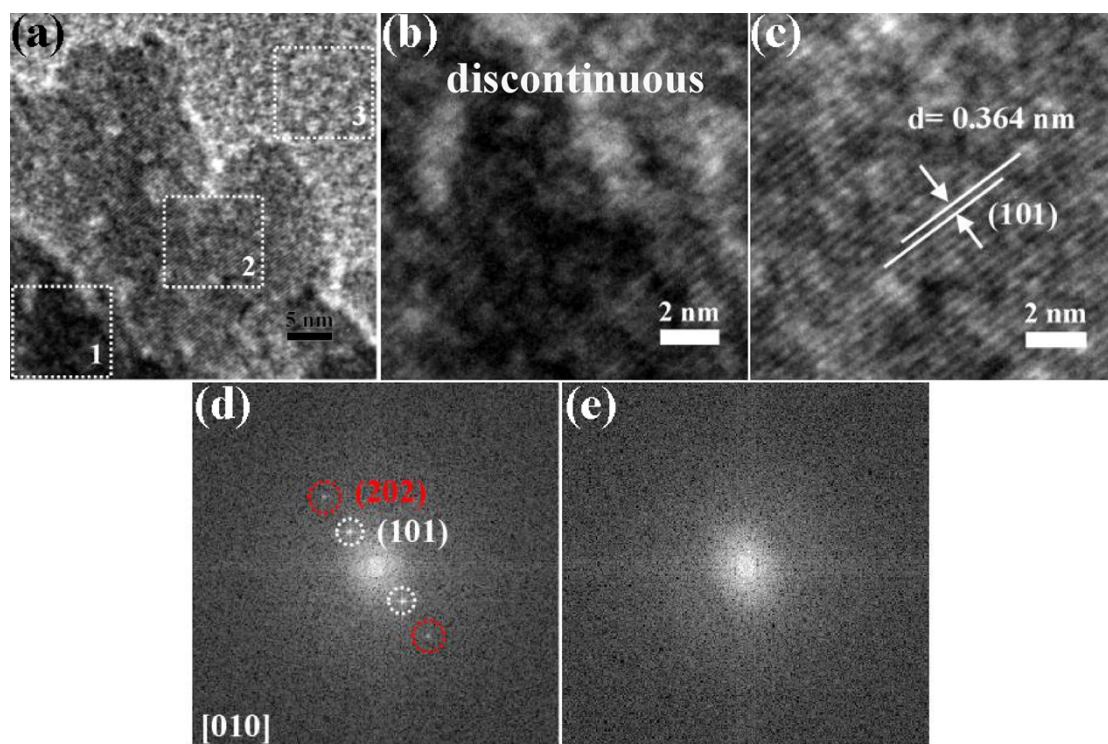

**Fig. S8** HRTEM images and FFT patterns of Bi-ene-NW: (a-b) HRTEM images with the enlarged (b) region 1 and (c) region 2; FFT patterns of (d) region 2 and (e) region 3.

Fig. S8a shows that the HRTEM image of Bi-ene-NW with three highlighted regions. The noticeable discontinuous lattice fringes were observed (Fig. S8b), which may be pertained to the inherited lattice defects. The lattice fringes of 0.364 nm are assigned to the (101) planes of rhombohedral Bi (Fig. S8c). The FFT pattern of region 2 can be assigned to the (101) and (202) facets (Fig. S8d). The FFT pattern of region 3 presents its amorphous characteristic, which may result from partial oxidation of Bi (Fig. S8e).

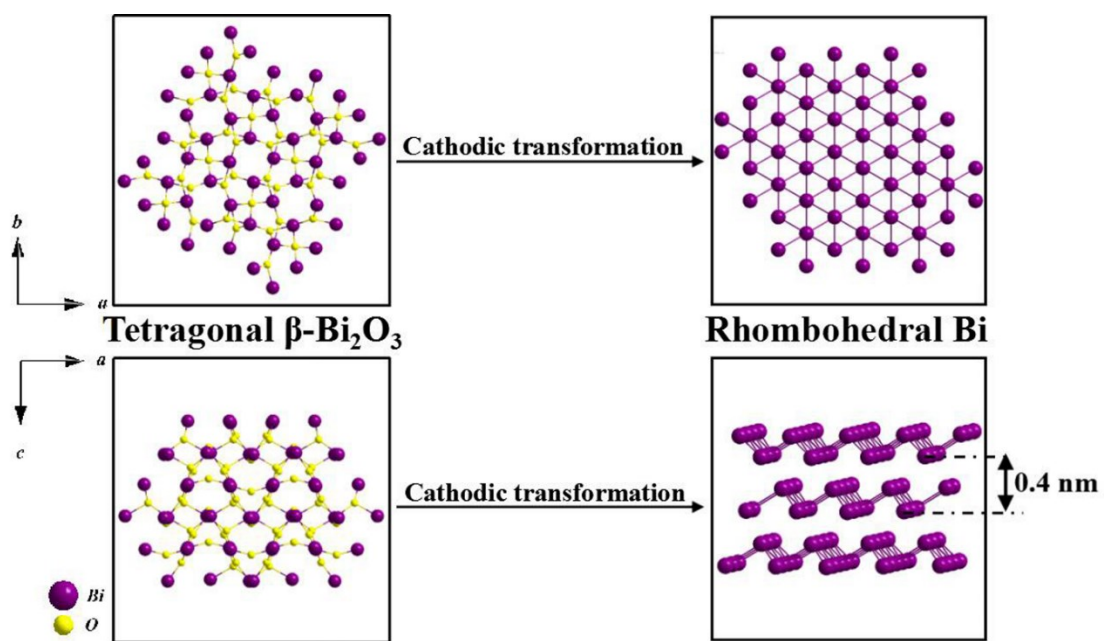

**Fig. S9** The crystal structure evolution of tetragonal  $\beta$ - $\text{Bi}_2\text{O}_3$  to rhombohedral Bi upon the cathodic transformation.

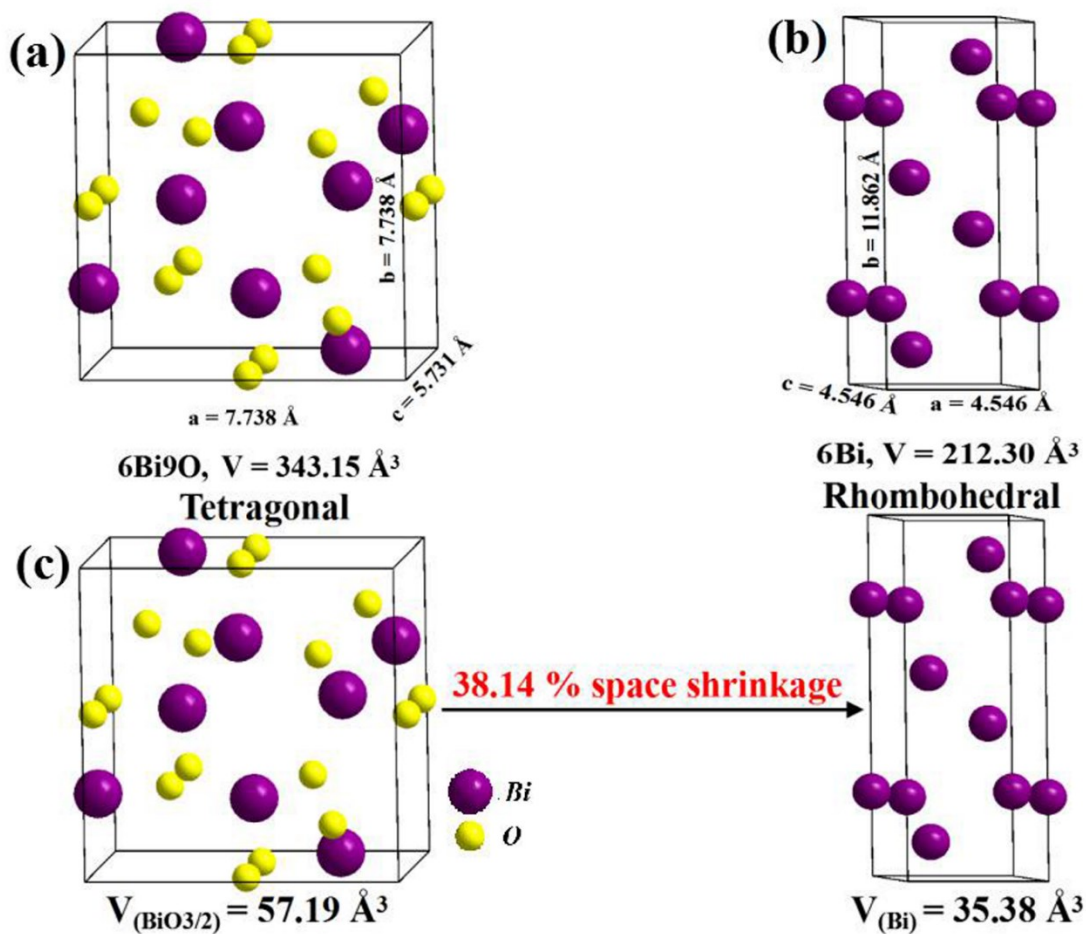

**Fig. S10** Theoretical investigation of the space shrinkage from tetragonal  $\beta\text{-Bi}_2\text{O}_3$  to rhombohedral Bi upon the cathodic transformation: (a, b) Unit cell parameters of  $\text{Bi}_2\text{O}_3$  and Bi; (c) Volumes normalized to Bi atoms and space shrinkage upon the transformation of  $\text{Bi}_2\text{O}_3$  to metallic Bi.

Fig. S10 shows the unit cell parameters of  $\beta\text{-Bi}_2\text{O}_3$  and Bi. The cell volumes of  $\text{Bi}_2\text{O}_3$  and Bi are 343.15 (containing 6 Bi and 9 O atoms) and  $212.3 \text{ \AA}^3$  (containing 6 Bi atoms), respectively, where their volumes normalized to Bi atoms are calculated to be 57.19 and  $35.38 \text{ \AA}^3$ , respectively. Correspondingly, the space shrinkage upon the transformation of  $\text{Bi}_2\text{O}_3$  to metallic Bi should be 38.14%.



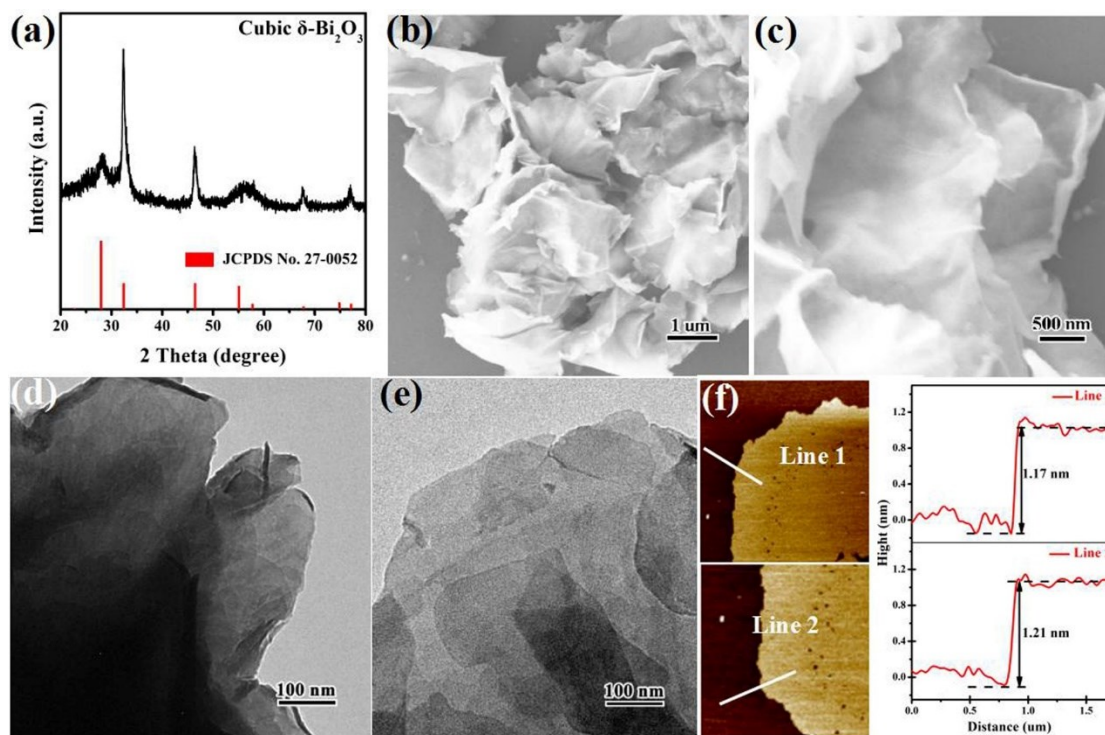

**Fig. S11** Characterization of the Bi<sub>2</sub>O<sub>3</sub> NSs as the precursor of Bi-NFs: (a) PXRD; (b, c) SEM images; (d, e) TEM images; (f) AFM images and corresponding height profiles.



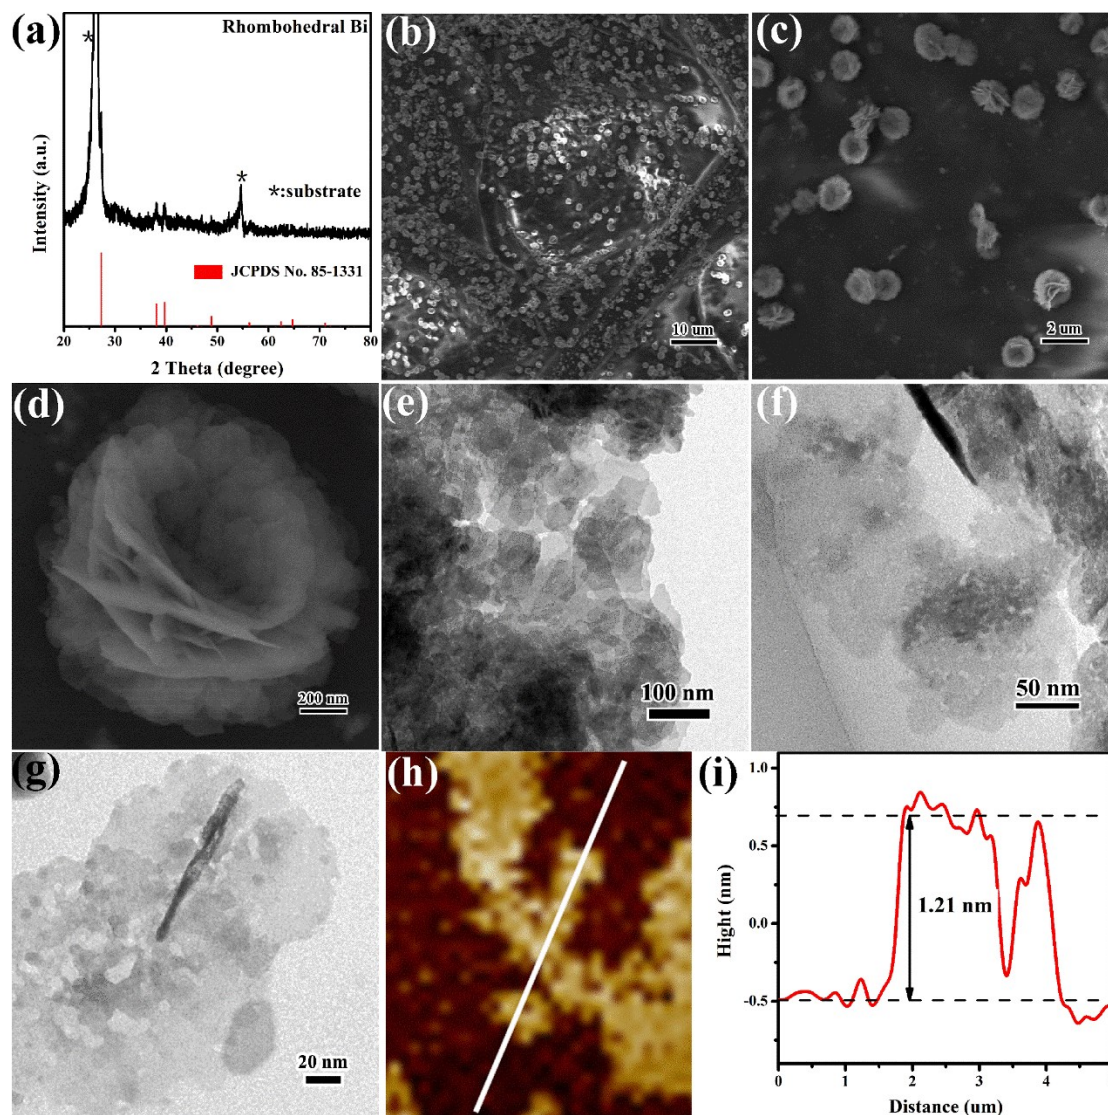

**Fig. S12** Characterization of Bi-NFs: (a) PXRD; (b-d) SEM images at different magnifications; (e-g) TEM images; (h, i) AFM images and corresponding height profiles.

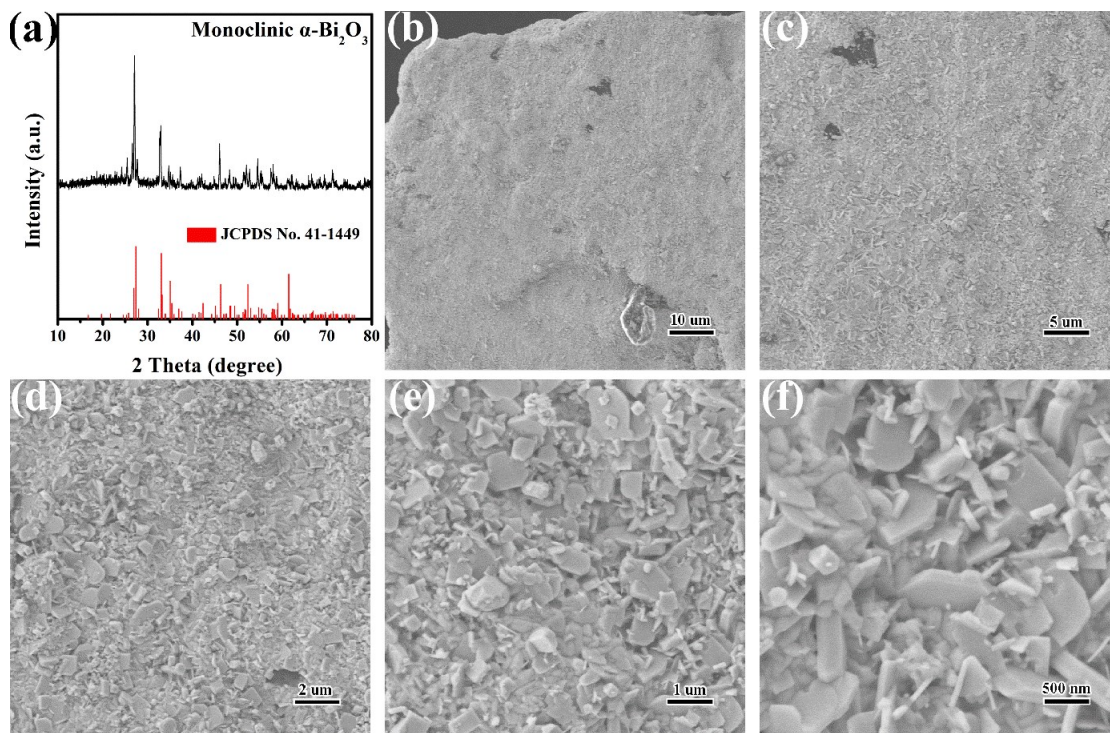

**Fig. S13** Characterization of the oxidized commercial Bi powder as the precursor of Bi-MPs: (a) PXRD pattern; (b-f) SEM images at different magnifications.

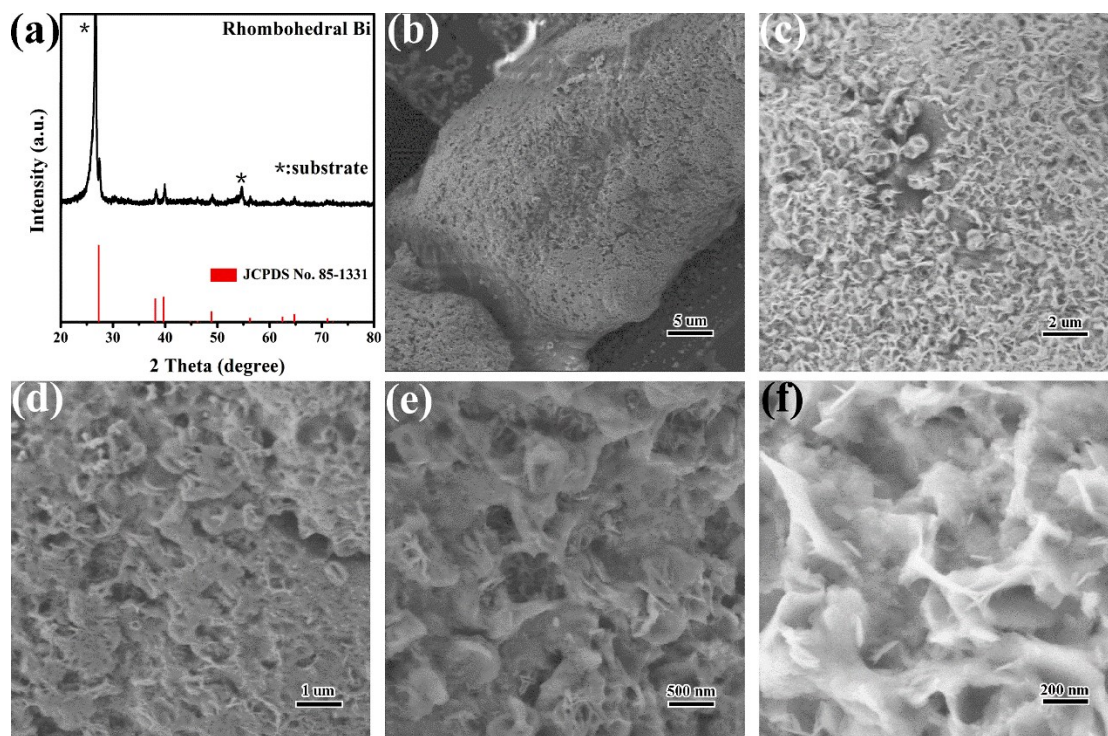

**Fig. S14** Characterization of Bi-MPs: (a) PXR D pattern; (b-f) SEM images at different magnifications.

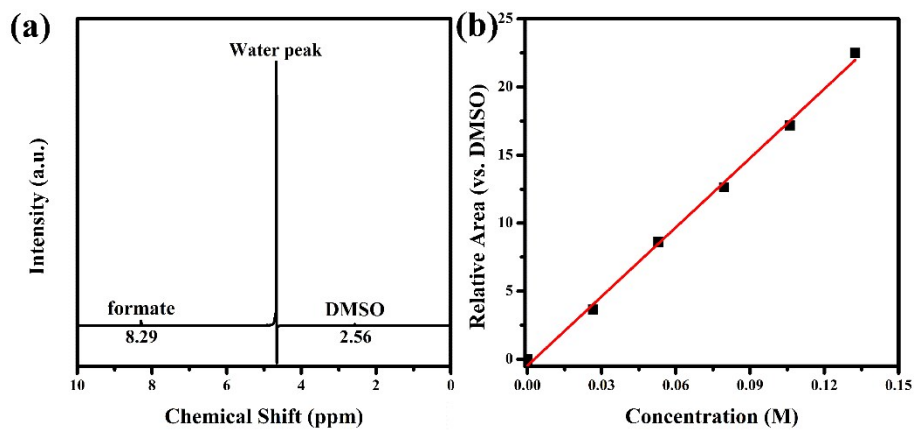

**Fig. S15** Identification and quantification of formate by NMR: (a) A typical NMR spectrum of the recycled electrolyte containing formate after electrolysis; (b) Standard curve by plotting the formate concentration with respect to the NMR peak area ratio of formate/DMSO.



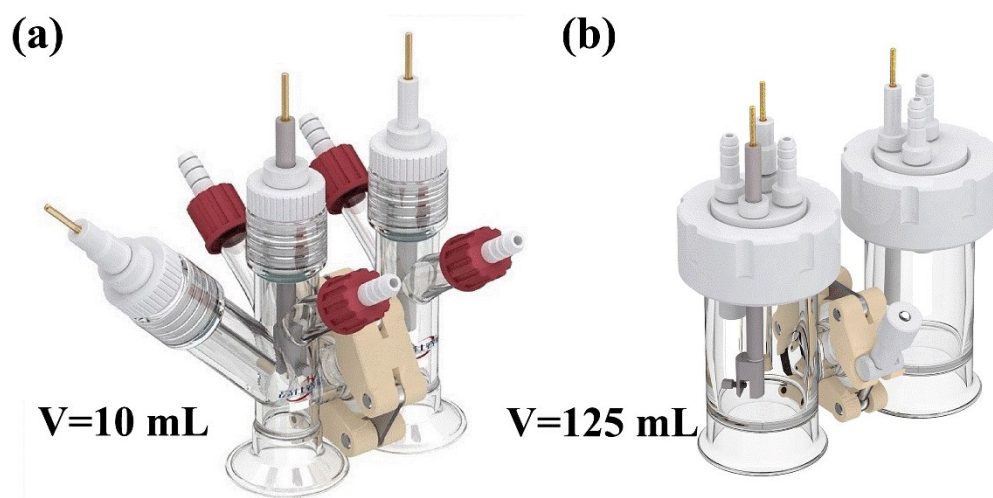

**Fig. S16** Photographic images of two typical H-type cells with different volumes for electrocatalytic CO<sub>2</sub> reduction.

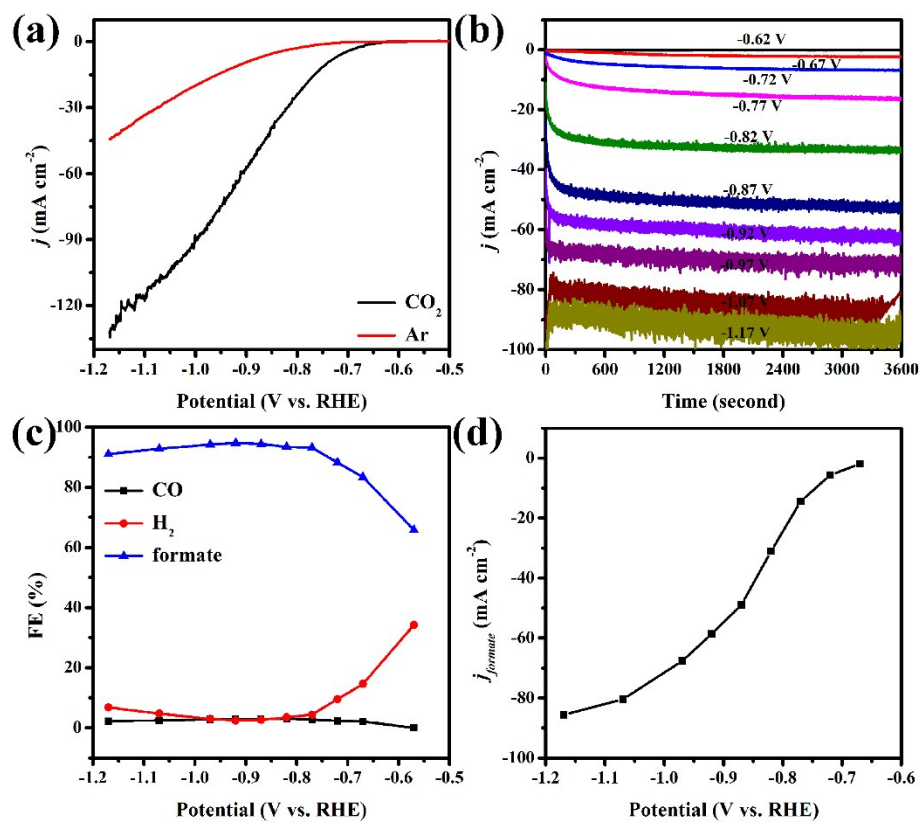

**Fig. S17** Electrocatalytic CO<sub>2</sub>RR performance of Bi-ene-NW in CO<sub>2</sub>-saturated 0.5 M KHCO<sub>3</sub>: (a) Polarization curves in Ar- or CO<sub>2</sub>-saturated solution; (b) Total current densities at designated potentials; (c) FE for formate, CO and H<sub>2</sub>; (d) Partial current densities of formate.

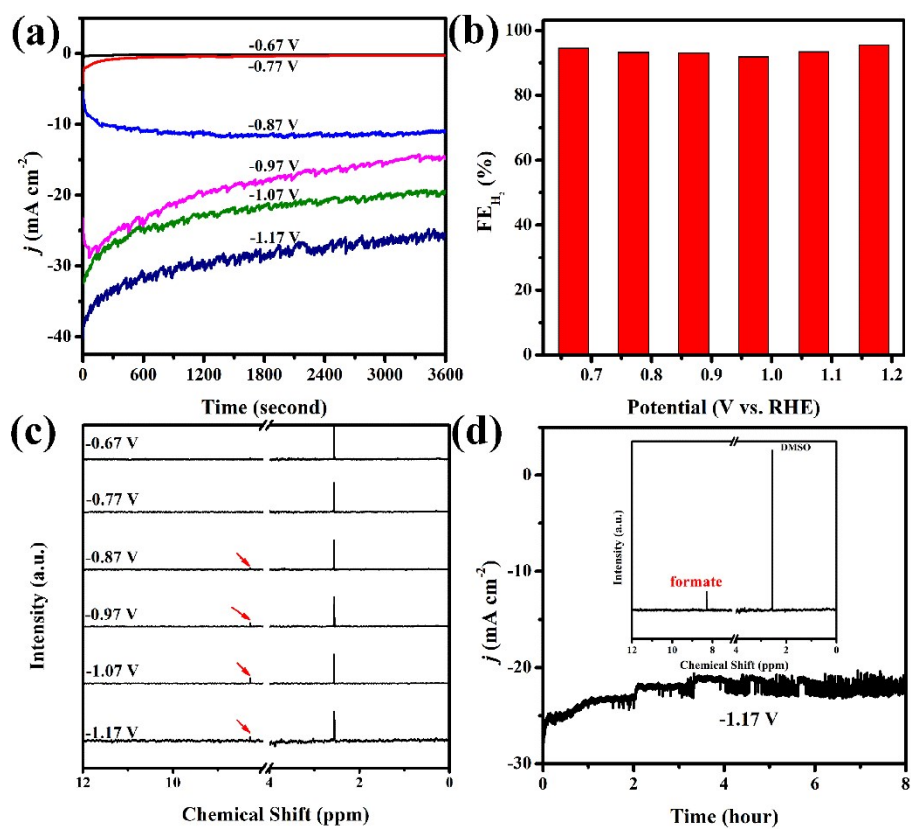

**Fig. S18** Electrocatalytic performance of Bi-ene-NW in Ar-saturated 0.5 M KHCO<sub>3</sub>: (a) Total current densities at designated potentials; (b) FE for H<sub>2</sub>; (c) NMR spectra of the catholyte recycled after electrolysis at designated potentials; (d) The long-term electrolysis at -1.17 V.

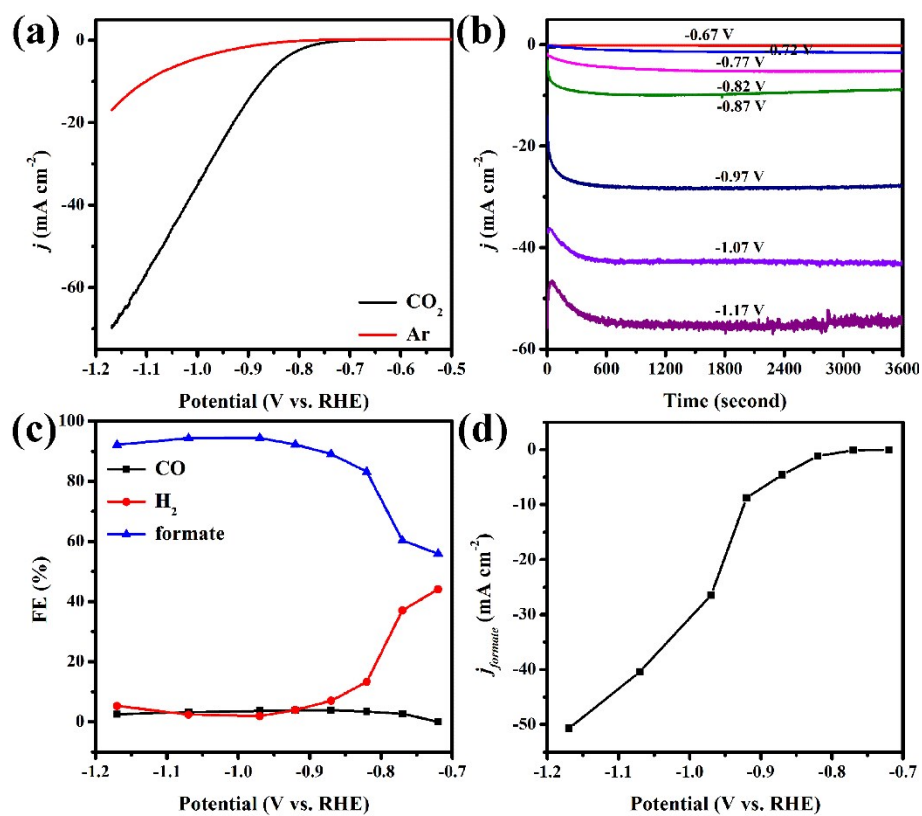

**Fig. S19** Electrocatalytic CO<sub>2</sub>RR performance of Bi-NFs in CO<sub>2</sub>-saturated 0.5 M KHCO<sub>3</sub>: (a) Polarization curves; (b) Total current densities at designated potentials; (c) FE for formate, CO and H<sub>2</sub>; (d) Partial current densities of formate.



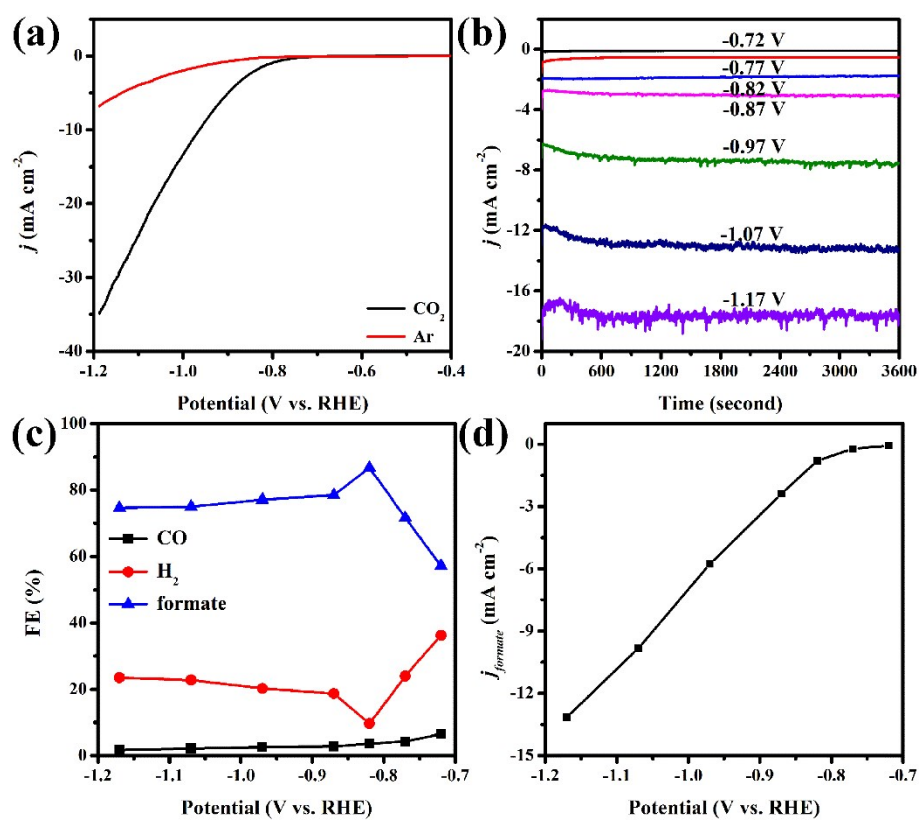

**Fig. S20** Electrocatalytic CO<sub>2</sub>RR performance of Bi-MPs in CO<sub>2</sub>-saturated 0.5 M KHCO<sub>3</sub>: (a) Polarization curves; (b) Total current densities at designated potentials; (c) FE for formate, CO and H<sub>2</sub>; (d) Partial current densities of formate.

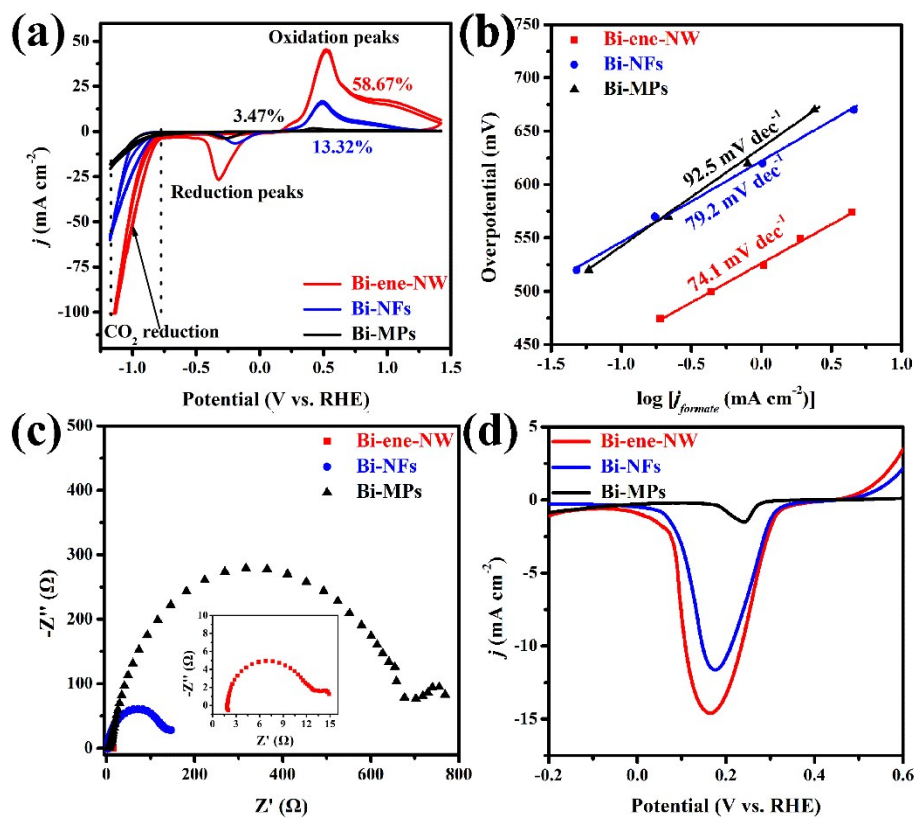

**Fig. S21** Different Bi-based catalysts for electrocatalytic CO<sub>2</sub> reduction: (a) CV curves; (b) Tafel plots; (c) Nyquist plots; (d) LSV curves in Ar-saturated 0.1 M KOH electrolyte.

CV curves of Bi-ene-NW, Bi-NFs and Bi-MPs electrode in a potential range from  $-1.17$  to  $1.43$  V are shown in Fig. S21a at a scan rate of  $100 \text{ mV s}^{-1}$ . The oxidation peak at  $0.525$  V over Bi-ene-NW belongs to the conversion of metallic Bi to Bi<sup>3+</sup>, the oxidation peak at  $-0.325$  V belongs to the conversion of Bi<sup>3+</sup> to metallic Bi, and the negative peak between of  $-1.17$  and  $-0.65$  V is attributed to CO<sub>2</sub> reduction. Based on the oxidation peak, the percentage ( $\chi$ ) of active Bi sites to the total Bi sites can be calculated as follows:

$$\chi = S_{\text{op}} / (n_{\text{total}} \times N \times \nu \times F \times S_{\text{area}}) \times 100\% \quad (4)$$

where  $S_{\text{op}}$  is area of oxidation peak,  $n_{\text{total}}$  is the total Bi sites which refers to the molar amount of Bi based on Bi<sub>2</sub>O<sub>3</sub> loaded to the electrode,  $N$  is the number of electrons required to convert Bi to Bi<sup>3+</sup>,  $\nu$  is scan rate,  $F$  is Faraday constant ( $96485 \text{ C mol}^{-1}$ ),  $S_{\text{area}}$  is the area of electrode.

Generally, a slope of  $118 \text{ mV dec}^{-1}$  implies the RDS is the formation of CO<sub>2</sub><sup>\*</sup>, whereas a slope of  $59 \text{ mV dec}^{-1}$  signifies that the subsequent slower step after CO<sub>2</sub><sup>\*</sup> formation is the RDS. For Bi-ene-NW, Tafel slope of  $75 \text{ mV dec}^{-1}$  is very close to  $59 \text{ mV dec}^{-1}$ .

The quick-balanced  $\text{CO}_2^{*-}$  enables protonation to proceed spontaneously to form the adsorbed  $\text{OCHO}^*$  for boosting the  $\text{CO}_2\text{RR}$  via the proton-coupled electron transfer (Fig. S21b). The electrochemical impedance spectroscopy (EIS) was recorded at  $-0.66$  V vs. RHE with the frequency ranging from  $0.1$  to  $10^5$  Hz at the AC amplitude of  $5$  mV (Fig. S21c). The adsorption of intermediates on active sites is very key for the reduction of  $\text{CO}_2$ . The overpotential of hydroxyl adsorption is considered a measure of binding strength of intermediates on catalytic surface, and the smaller overpotential indicates the larger binding energy (stronger binding) of intermediates. Due to the similar binding behaviors, the adsorption of  $\text{OH}^-$  as a surrogate of  $\text{CO}_2^{*-}$  was examined through a cathodic LSV scan between  $-0.2$  and  $0.6$  V in Ar-saturated aqueous  $0.1$  M KOH solution at a scan rate of  $20$   $\text{mV s}^{-1}$  (Fig. S21d).

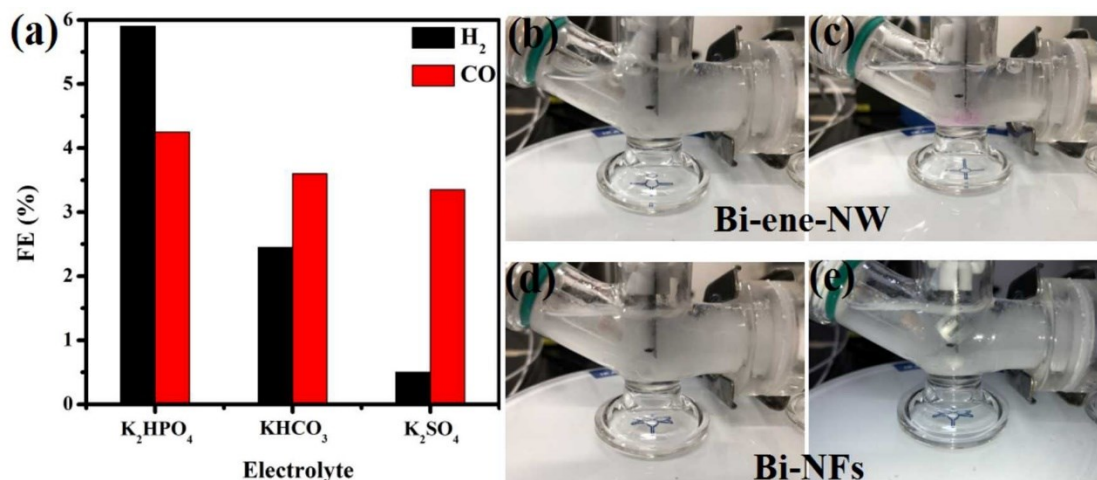

**Fig. S22** (a) The pH-dependent FE of H<sub>2</sub> and CO over Bi-ene-NW in different electrolytes (0.5 M); (b-e) Photographic images of the phenolphthalein color transition experiment over Bi-ene-NW and Bi-NFs conducted at  $-1.0$  V vs. RHE in CO<sub>2</sub>-saturated aqueous 0.5 M KHCO<sub>3</sub> solution before (left) and after (right) electrolysis for 1 min.

In the local pH effect experiment, CO<sub>2</sub>-saturated 0.5 M K<sub>2</sub>HPO<sub>4</sub>, KHCO<sub>3</sub> and K<sub>2</sub>SO<sub>4</sub> were used as the respective electrolytes, and the geometric current density was set as a constant value of 20 mA cm<sup>-2</sup> (Fig. S22a). The phenolphthalein color transition experiment was conducted at  $-1.0$  V vs. RHE and 1 mL of 0.05 M phenolphthalein in ethanol was added into the electrolyte (CO<sub>2</sub>-saturated aqueous 0.5 M KHCO<sub>3</sub> solution) in the working compartment (Fig. S22b-e). Fig. S22b,d shows that at the beginning of the experiment, no pink color was seen in both electrolytes using Bi-ene-NW and Bi-NFs as the catalysts (The pH value of CO<sub>2</sub>-saturated aqueous 0.5 M KHCO<sub>3</sub> solution is about 7.4, while the colorless-to-pink transition point of phenolphthalein is at pH  $\sim$  8.3). After electrolysis for 1 min, dark pink color could be observed around the Bi-ene-NW cathode, while pink color was still unseen in the Bi-NFs cathode (Fig. S22c,e). The results illustrate that the higher current density over Bi-ene-NW could enhance the local pH over 8.3, while the increase of local pH over Bi-NFs was too small to trigger the phenolphthalein color transition.

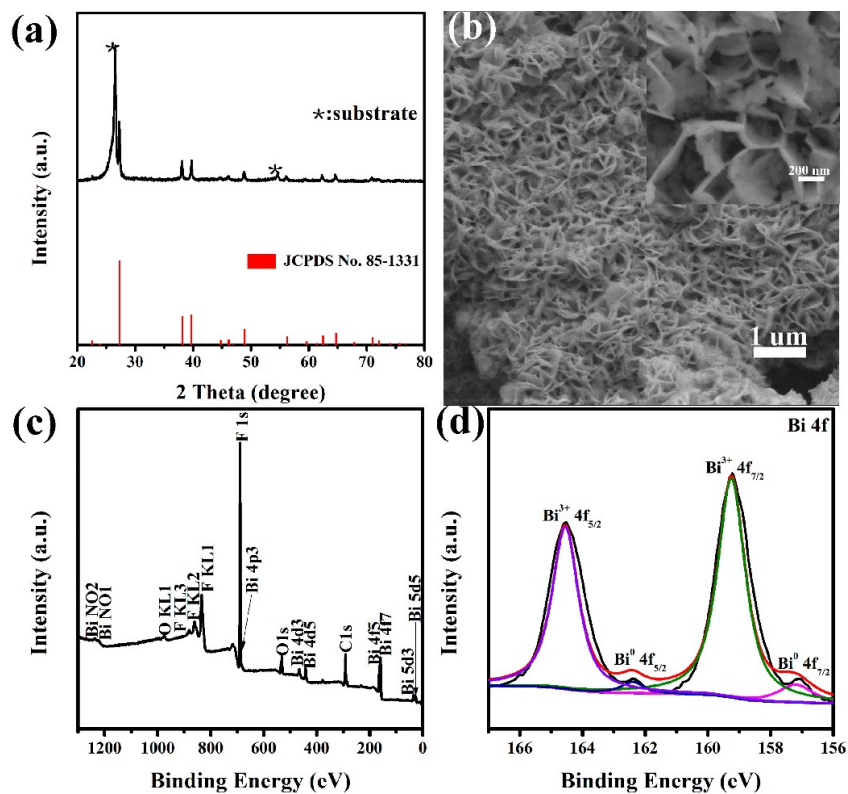

**Fig. S23** Characterization of Bi-ene-NW after long-term stability test: (a) PXRD pattern; (b) SEM images; (c) XPS survey spectrum; (d) XPS Bi 4f spectrum.

The crystalline state, morphology and surface condition of the recycled Bi-ene-NW also were surveyed by PXRD, SEM and XPS measurements. No obvious change in crystalline state, and morphology for the recycled Bi-ene-NW was observed in Fig. S23 (a, b). XPS survey spectrum in Fig. S23c presents the orbital peaks of the Bi, C, F and O elements, and the F element originates from the Nafion polymer. The appearance of  $\text{Bi}^{3+}$  in Bi-ene-NW should be attributed to partial oxidation of its highly exposed surface (Fig. S23d).

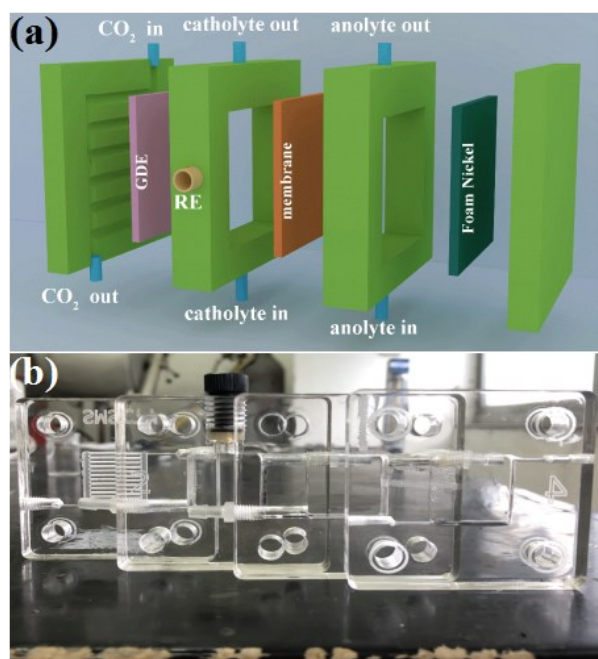

**Fig. S24** Flow cell configuration for electrocatalytic CO<sub>2</sub> reduction: (a) schematic diagram; (b) actual photograph.

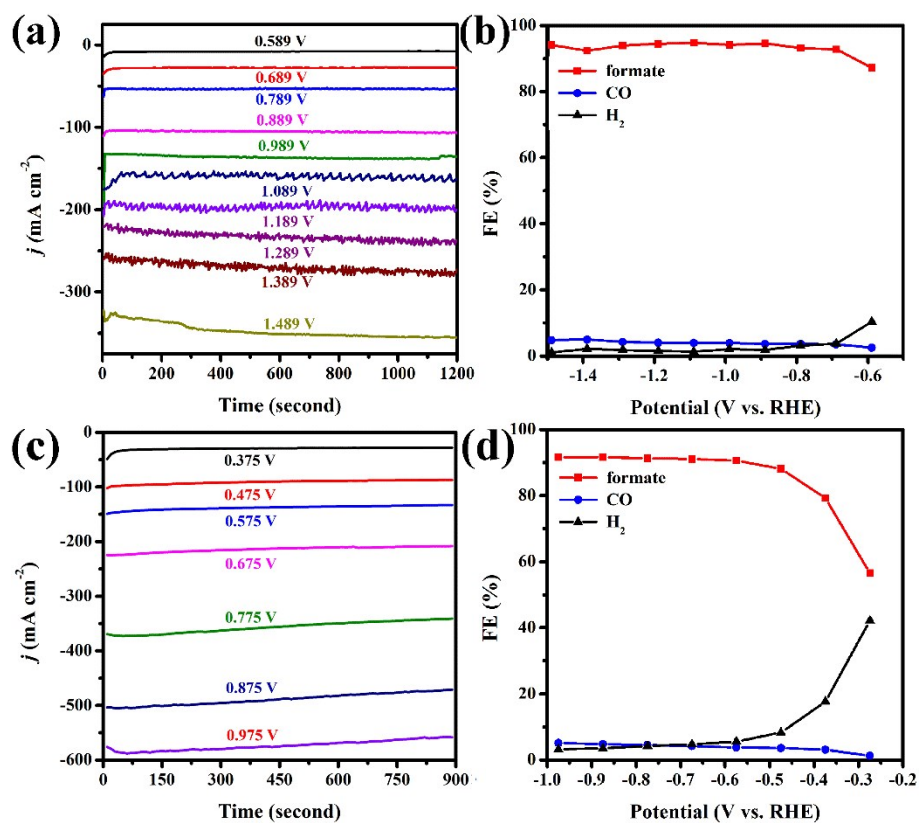

**Fig. S25** Electrocatalytic CO<sub>2</sub>RR performance of Bi-ene-NW in a flow cell: Chronoamperometric responses at different potentials and corresponding FE for formate, CO and H<sub>2</sub> in (a, b) 1.0 M KHCO<sub>3</sub> and (c, d) 1.0 M KOH.

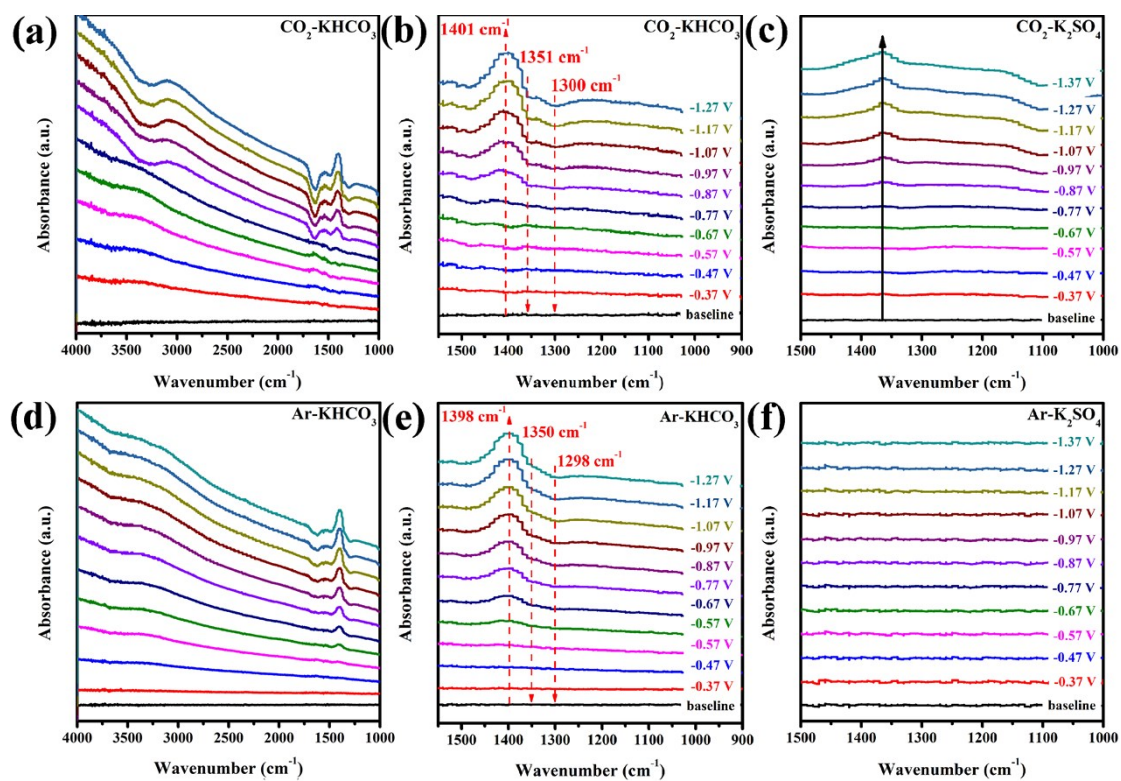

**Fig. S26** Operando ATR-IR spectra collected over Bi-ene-NW at different applied potentials in (a, b)  $\text{CO}_2$ -saturated 0.5 M  $\text{KHCO}_3$ ; (c)  $\text{CO}_2$ -saturated 0.5 M  $\text{K}_2\text{SO}_4$ ; (d, e) Ar-saturated 0.5 M  $\text{KHCO}_3$ ; and (f) Ar-saturated 0.5 M  $\text{K}_2\text{SO}_4$ .

The operando ATR-IR spectra were collected in a single electrochemical cell by using a typical three-electrode system (Bi-ene-NW, Pt wire and saturated Ag/AgCl were used as the working, counter and reference electrodes). During the test process, the surface of the working electrode was pressed close to a Ge single crystal to ensure the obtaining of better IR signals.



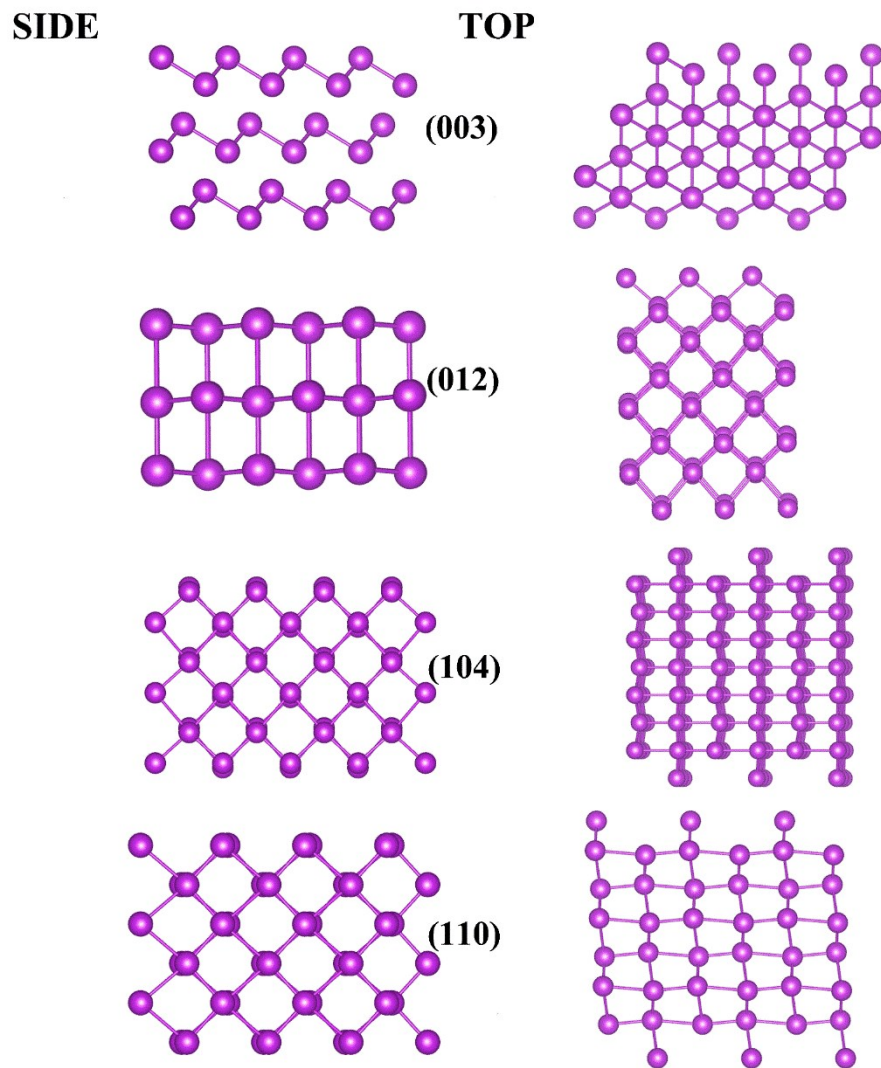

**Fig. S27** Diagram of different crystal planes of Bi-ene-NW.

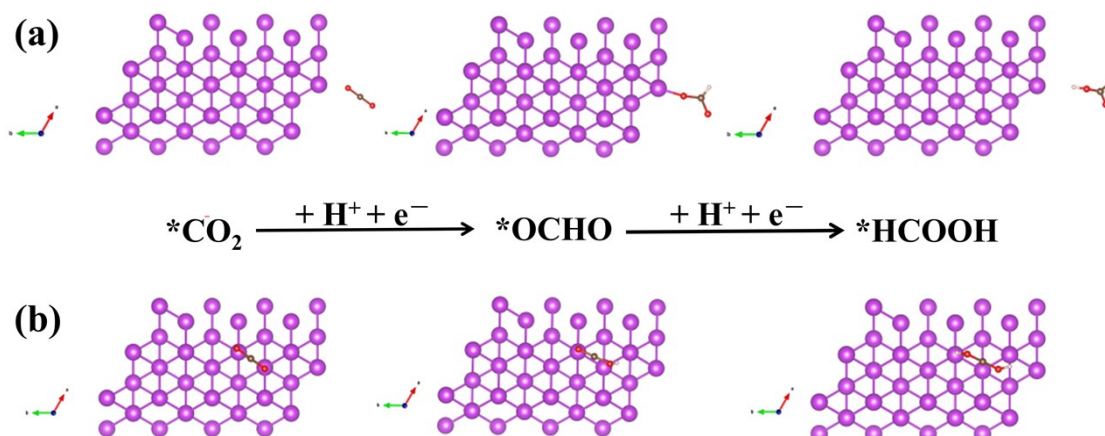

**Fig. S28** The DFT-optimized intermediate species along the reaction pathways for CO<sub>2</sub> electroreduction to formate on the (a) edge and (b) plane of Bi-ene.

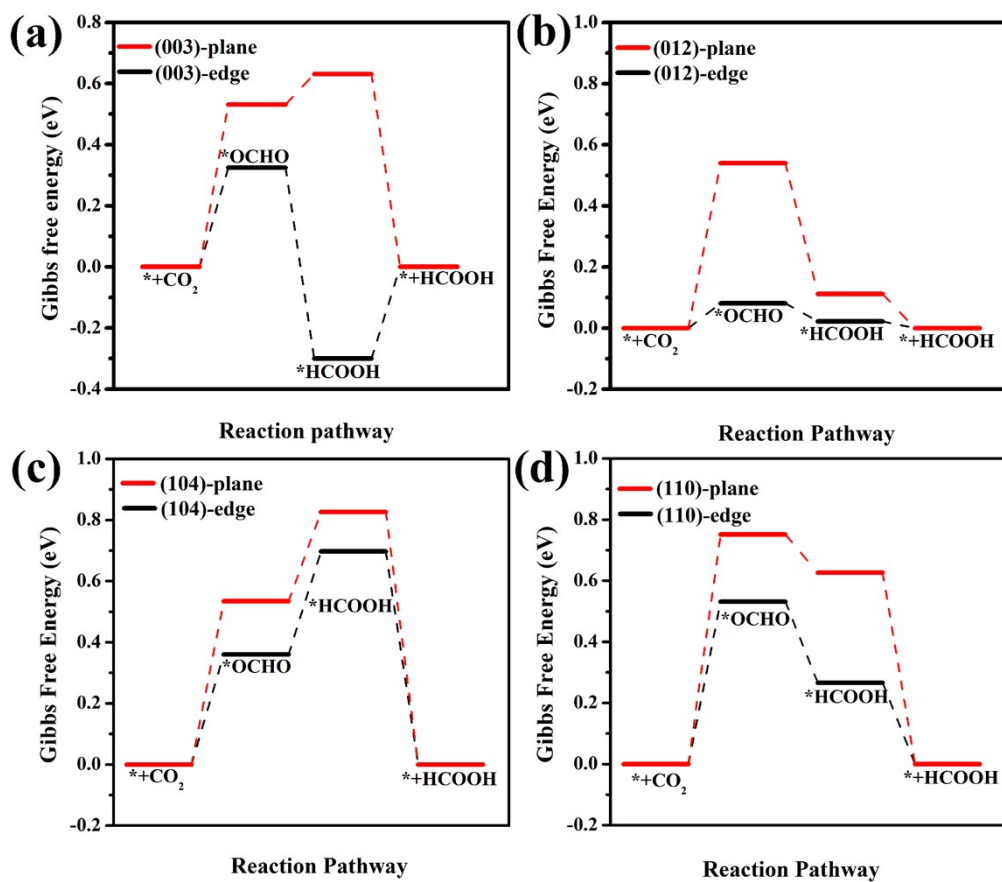

**Fig. S29** DFT-calculated  $\Delta G$  in the reaction pathways of CO<sub>2</sub> conversion into formate on the plane site and edge site: (a) (003) plane; (b) (012) plane; (c) (104) plane; (d) (110) plane.

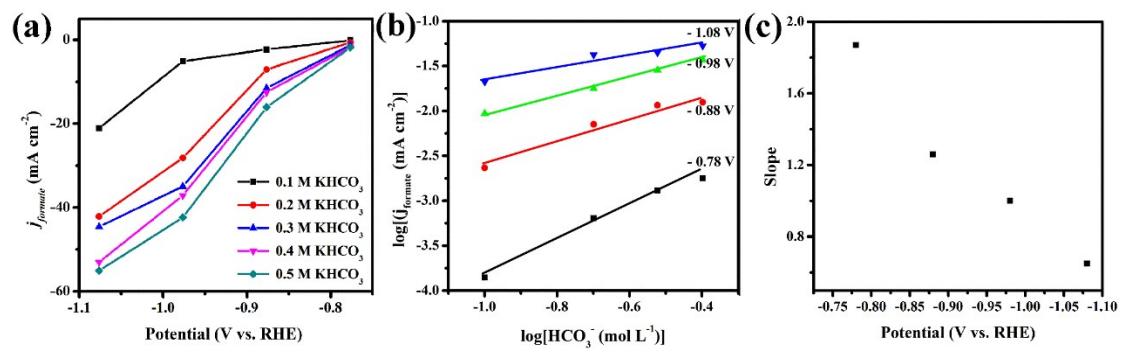

**Fig. S30** (a) Partial current densities of formate over Bi-ene-NW in CO<sub>2</sub>-saturated KHCO<sub>3</sub> solution with different concentrations; (b) Plots of  $\log[j_{\text{formate}} \text{ (mA cm}^{-2}\text{)}]$  versus  $\log[\text{HCO}_3^- \text{ (mol L}^{-1}\text{)}]$  at different constant potentials; (c) The corresponding slopes of the plots in (b) at different potentials.

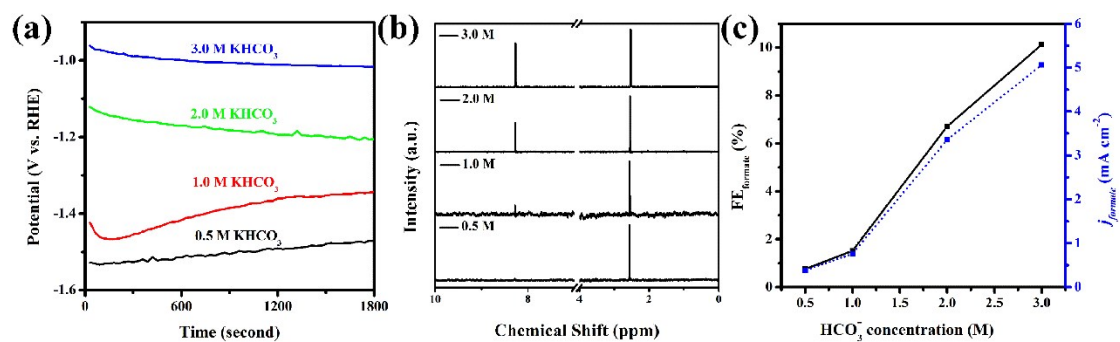

**Fig. S31** Electrocatalytic performance of Bi-ene-NW in Ar-saturated KHCO<sub>3</sub> with different HCO<sub>3</sub><sup>-</sup> concentrations: (a) Chronoamperometric responses at the same current density of 50 mA cm<sup>-2</sup>; (b) The NMR spectra of the catholytes recycled after electrolysis for 0.5 h; (c) FE<sub>formate</sub> and partial current densities of formate at 50 mA cm<sup>-2</sup>.

### 3. Supplementary tables

**Table S1** CO<sub>2</sub>RR catalytic performances of recently reported Bi-based catalysts for formate production in H-cell.

| Catalyst         | Electrolyte                   | Potential (V vs. RHE) | Current density (mA cm <sup>-2</sup> ) | FE (%)    | Stability              | Reference        |
|------------------|-------------------------------|-----------------------|----------------------------------------|-----------|------------------------|------------------|
| <b>Bi-ene-NW</b> | <b>0.5 M KHCO<sub>3</sub></b> | <b>-1.17</b>          | <b>88</b>                              | <b>92</b> | <b>500 h (~100 mA)</b> | <b>This work</b> |
| Bi nanosheet     | 0.1 M KHCO <sub>3</sub>       | -1.2                  | 18                                     | 70        | 10 h (~17 mA)          | S1               |
| BOCNS            | 0.5 M NaHCO <sub>3</sub>      | -1.0                  | 35                                     | 83        | 12 h (~11 mA)          | S2               |
| AgBi-500         | 0.1 M KHCO <sub>3</sub>       | -1.1                  | 26                                     | 85        | 12 h (~13 mA)          | S3               |
| mpBi             | 0.5 M NaHCO <sub>3</sub>      | -1.0                  | 17                                     | 87        | 12 h (~5 mA)           | S4               |
| Cufoam@BiNW      | 0.5 M NaHCO <sub>3</sub>      | -1.09                 | 46                                     | 88        | 12 h (~16 mA)          | S5               |
| NTD-Bi           | 0.5 M KHCO <sub>3</sub>       | -1.05                 | 60                                     | 90        | 48 h (~36 mA)          | S6               |
| BBNs             | 0.5 M NaHCO <sub>3</sub>      | -0.85                 | 13.5                                   | 91        | 12 h (~11.5 mA)        | S7               |
| Bi-Sn/CF         | 0.5 M KHCO <sub>3</sub>       | -1.14                 | 53                                     | 96        | 100 h (~55 mA)         | S8               |

**Table S2** CO<sub>2</sub>RR catalytic performances of recently reported Bi-based catalysts for formate in Flow-cell.

| Catalyst                              | Electrolyte                 | Potential (V vs. RHE) | Current density (mA cm <sup>-2</sup> ) | FE (%)    | Stability              | Reference        |
|---------------------------------------|-----------------------------|-----------------------|----------------------------------------|-----------|------------------------|------------------|
| <b>Bi-ene-NW</b>                      | <b>1 M KHCO<sub>3</sub></b> | <b>-1.47</b>          | <b>350</b>                             | <b>91</b> | <b>110 h (~200 mA)</b> | <b>This work</b> |
|                                       | <b>1 M KOH</b>              | <b>-0.97</b>          | <b>570</b>                             | <b>91</b> | <b>18 h (~200 mA)</b>  |                  |
| bismuthene nanosheets                 | 1 M KHCO <sub>3</sub>       | -1.5                  | 325                                    | 87        | 25 h (~50 mA)          | S9               |
| Bi <sub>2</sub> O <sub>3</sub> @C-800 | 1 M KOH                     | -1.1                  | 208                                    | 93        | 1 h (~150 mA)          | S10              |
| Bi NSs                                | 1 M KOH                     | -0.465                | 198                                    | 86.55     | 25 min (~198 mA)       | S11              |
| Bi <sub>2</sub> S <sub>3</sub> NPs    | 1 M KOH                     | -0.59                 | 205                                    | 90        | 6 h (~120 mA)          | S12              |
| PD-Bi1                                | 1 M KHCO <sub>3</sub>       | -1.09                 | 46                                     | 88        | 12 h (~16 mA)          | S13              |
|                                       | 1 M KOH                     | -0.6                  | 288                                    | 98        | 11 h (~210 mA)         |                  |
| NTD-Bi                                | 1 M KHCO <sub>3</sub>       | -0.85                 | 140                                    | 95        | 13 h (~140 mA)         | S6               |
|                                       | 1 M KOH                     | -0.6                  | 288                                    | 98        | 11 h (~210 mA)         |                  |
| Leafy Bi-NS                           | 1 M KHCO <sub>3</sub>       | -1.51                 | 400                                    | 86.9      | 10 h (~128 mA)         | S14              |
|                                       | 1M KOH                      | -0.67                 | 400                                    | 89        | 10 h (~197 mA)         |                  |

#### 4. Supplementary references

- S1 W. Zhang, Y. Hu, L. Ma, G. Zhu, P. Zhao, X. Xue, R. Chen, S. Yang, J. Ma, J. Liu and Z. Jin, *Nano Energy*, 2018, **53**, 808-816.
- S2 Y. Zhang, X. Zhang, Y. Ling, F. Li, A. M. Bond and J. Zhang, *Angew. Chem. Int. Ed.*, 2018, **57**, 13283-13287.
- S3 J. H. Zhou, K. Yuan, L. Zhou, Y. Guo, M. Y. Luo, X. Y. Guo, Q. Y. Meng and Y. W. Zhang, *Angew. Chem. Int. Ed.*, 2019, **131**, 14335-14339.
- S4 H. Yang, N. Han, J. Deng, J. Wu, Y. Wang, Y. Hu, P. Ding, Y. Li, Y. Li and J. Lu, *Adv. Energy Mater.*, 2018, **8**, 1801536.
- S5 X. Zhang, X. Sun, S.-X. Guo, A. M. Bond and J. Zhang, *Energy Environ. Sci.*, 2019, **12**, 1334-1340.
- S6 Q. Gong, P. Ding, M. Xu, X. Zhu, M. Wang, J. Deng, Q. Ma, N. Han, Y. Zhu, J. Lu, Z. Feng, Y. Li, W. Zhou and Y. Li, *Nat. Commun.*, 2019, **10**, 2807.
- S7 J. Zhu, J. Fan, T. Cheng, M. Cao, Z. Sun, R. Zhou, L. Huang, D. Wang, Y. Li and Y. Wu, *Nano Energy*, 2020, **75**, 104939.
- S8 G. Wen, D. U. Lee, B. Ren, F. M. Hassan, G. Jiang, Z. P. Cano, J. Gostick, E. Croiset, Z. Bai, L. Yang and Z. Chen, *Adv. Energy Mater.*, 2018, **8**, 1802427.
- S9 W. Ma, J. Bu, Z. Liu, C. Yan, Y. Yao, N. Chang, H. Zhang, T. Wang and J. Zhang, *Adv. Funct. Mater.*, 2020, **31**, 2006704.
- S10 P. Deng, F. Yang, Z. Wang, S. Chen, Y. Zhou, S. Zaman and B. Y. Xia, *Angew. Chem. Int. Ed.*, 2020, **59**, 10807-10813.
- S11 X. Wang, W.-J. Yin, Y. Si, X. Wang, X. Guo, W. Guo and Y. Fu, *J. Mater. Chem. A*, 2020, **8**, 19938-19945.
- S12 P. Ding, J. Zhang, N. Han, Y. Zhou, L. Jia and Y. Li, *J. Mater. Chem. A*, 2020, **8**, 12385-12390.
- S13 Y. Wang, Y. Li, J. Liu, C. Dong, C. Xiao, L. Cheng, H. Jiang, H. Jiang and C. Li, *Angew. Chem. Int. Ed.*, 2021, **60**, 7681-7685.
- S14 J. Yang, X. Wang, Y. Qu, X. Wang, H. Huo, Q. Fan, J. Wang, L. M. Yang and Y. Wu, *Adv. Energy Mater.*, 2020, **10**, 2001709.
- S15 G. Kresse and J. Hafner, *Phys. Rev. B*, 1993, **47**, 558.
- S16 G. Kresse and J. Furthmüller, *Comput. mater. Sci.*, 1996, **6**, 15-50.
- S17 P. E. Blöchl, *Phys. rev. B*, 1994, **50**, 17953.
- S18 J. P. Perdew, K. Burke and M. Ernzerhof, *Phys. Rev. Lett.*, 1996, **77**, 3865.
